# High-quality chromosome-scale assembly of the walnut (*Juglans regia* L) reference genome

Annarita Marrano<sup>1\*</sup>, Monica Britton<sup>2</sup>, Paulo A. Zaini<sup>1</sup>, Aleksey V. Zimin<sup>3</sup>, Rachael E. Workman<sup>3</sup>, Daniela Puiu<sup>4</sup>, Luca Bianco<sup>5</sup>, Erica Adele Di Pierro<sup>5</sup>, Brian J. Allen<sup>1</sup>, Sandeep Chakraborty<sup>1</sup>, Michela Troglio<sup>5</sup>, Charles A. Leslie<sup>1</sup>, Winston Timp<sup>3</sup>, Abhaya Dandekar<sup>1</sup>, Steven L. Salzberg<sup>3,4,6</sup>, and David B. Neale<sup>1</sup>

<sup>1</sup> Department of Plant Sciences, University of California, Davis, CA 95616, USA

<sup>2</sup> Bioinformatics Core Facility, Genome Center, University of California Davis, CA 95616, USA

<sup>3</sup> Department of Biomedical Engineering, Johns Hopkins University, Baltimore, MD 21205, USA

<sup>4</sup> Center for Computational Biology, Whiting School of Engineering, Johns Hopkins University, Baltimore, MD 21205, USA

<sup>5</sup> Research and Innovation Center, Department of Genomics and Biology of Fruit Crops, Fondazione E Mach, San Michele all' Adige (TN) 38010, Italy

<sup>6</sup> Departments of Computer Science and Biostatistics, Johns Hopkins University, Baltimore, MD 21218

\***corresponding author:** email: [amarrano@ucdavis.edu](mailto:amarrano@ucdavis.edu); address: Department of Plant Science, 262 Robbins Hall, University of California, Davis, One Shields Ave, Davis (CA)

**Running Title:** Chromosome-scale walnut reference genome

**Keywords:** Nanopore, Hi-C, IsoSeq, gene prediction, genetic diversity, proteome, allergens.

## 27 **ABSTRACT**

28 The release of the first reference genome of walnut (*Juglans regia* L.) enabled many achievements  
29 in the characterization of walnut genetic and functional variation. However, it is highly  
30 fragmented, preventing the integration of genetic, transcriptomic, and proteomic information to  
31 fully elucidate walnut biological processes. Here we report the new chromosome-scale assembly  
32 of the walnut reference genome (Chandler v2.0) obtained by combining Oxford Nanopore long-  
33 read sequencing with chromosome conformation capture (Hi-C) technology. Relative to the  
34 previous reference genome, the new assembly features an 84.4-fold increase in N50 size, and the  
35 full sequence of all 16 chromosomal pseudomolecules, nine of which present telomere sequences  
36 at both ends. Using full-length transcripts from single-molecule real-time sequencing, we predicted  
37 40,491 gene models, with a mean gene length higher than the previous gene annotations. Most of  
38 the new protein-coding genes (90%) are full-length, which represents a significant improvement  
39 compared to Chandler v1.0 (only 48%). We then tested the potential impact of the new  
40 chromosome-level genome on different areas of walnut research. By studying the proteome  
41 changes occurring during catkin development, we observed that the virtual proteome obtained  
42 from Chandler v2.0 presents fewer artifacts than the previous reference genome, enabling the  
43 identification of a new potential pollen allergen in walnut. Also, the new chromosome-scale  
44 genome facilitates in-depth studies of intraspecies genetic diversity by revealing previously  
45 undetected autozygous regions in Chandler, likely resulting from inbreeding, and 195 genomic  
46 regions highly differentiated between Western and Eastern walnut cultivars. Overall, Chandler  
47 v2.0 is a valuable resource to understand and explore walnut biology better.

48

## 49 **INTRODUCTION**

50 Persian walnut (*Juglans regia* L.) is among the top three most-consumed nuts in the world, and  
51 over the last ten years, its global production increased by 37% (International Nut and Dried Fruit  
52 Council, 2019). Its richness in alpha-linolenic acid (ALA), proteins, minerals and vitamins along  
53 with documented benefits for human health explains this increased interest in walnut consumption  
54 (Martínez et al. 2010). As suggested by its generic name *Juglans* from the Latin appellation ‘*Jovis*  
55 *glans*’, which loosely means ‘nut of gods’, the culinary and medical value of Persian walnut was  
56 already widely prized by ancient civilizations (McGranahan and Leslie 2012).

57 The origin and evolution of the Persian walnut are the results of a complex interplay between  
58 hybridization, human migration and biogeographical forces (Pollegioni et al. 2017). A recent  
59 phylogenomic analysis revealed that Persian walnut (and its landrace *J. sigillata*) arose from an  
60 ancient hybridization between American black walnuts and Asian butternuts during the late  
61 Pliocene (3.45 Mya) (Zhang et al. 2019). Evidence suggests that the mountains of Central Asia  
62 were the cradle of domestication of Persian walnut (Zeven and Zhukovskiĭ 1975), from where it  
63 spread to the rest of Asia, the Balkans, Europe and, finally, the Americas.

64 Today, walnut is cultivated worldwide in an area of 1,587,566 ha, mostly in China and the USA  
65 (FAOSTAT statistics, 2017). Considerable phenotypic and genetic variability can be observed in  
66 this wide distribution area, especially in the Eastern countries, where walnuts can still be found in  
67 wild fruit forests. Many studies on genetic diversity in walnut have outlined a genetic  
68 differentiation between Eastern and Western genotypes (Ebrahimi et al. 2016; Marrano et al.  
69 2018). Moreover, walnuts from Eastern Europe, Central Asia, and China exhibit higher genetic  
70 diversity and a higher number of rare alleles than the genotypes from Western countries (Bernard  
71 et al. 2018a).

72 The release of the first reference genome, Chandler v1.0 (Martínez-García et al. 2016), enabled  
73 the study of walnut genetics at a genome-wide scale. For the first time, it was possible to explore  
74 the gene space of Persian walnut with the prediction of 32,498 gene models, providing the basis  
75 to untangle complex phenotypic pathways, such as those responsible for the synthesis of phenolic  
76 compounds. The availability of a reference genome marked the beginning of a genomics phase in  
77 Persian walnut, allowing whole-genome resequencing (Stevens et al. 2018; Zhang et al. 2019), the  
78 development of high-density genotyping tools (Marrano et al. 2018; Kefayati et al. 2018) and the  
79 genetic dissection of important agronomical traits in walnut (Arab et al. 2019; Famula et al. 2019;  
80 Marrano et al. 2019). However, the Chandler v1.0 assembly is highly fragmented, compromising  
81 the accuracy of gene prediction and the fulfillment of advanced genomics studies necessary to  
82 resolve many, still unanswered questions in walnut research.

83 The recent introduction of long-read sequencing technologies and long-range scaffolding methods  
84 has enabled chromosome-scale assembly for multiple plant species, including highly heterozygous  
85 tree crops such as almond (*Prunus dulcis*; (Sánchez-Pérez et al. 2019) and kiwifruit (*Actinidia*  
86 *eriantha*; (Tang et al. 2019). The availability of genomes with fully assembled chromosomes  
87 provides foundations for understanding plant domestication and evolution (Jarvis et al. 2017;  
88 Maccaferri et al. 2019; Sánchez-Pérez et al. 2019), the mechanisms governing important traits (e.g.  
89 flower color and scent; (Raymond et al. 2018), as well as the impact of epigenetic modifications  
90 on phenotypic variability (Daccord et al. 2017). Recently, Zhu et al., (2019) assembled the parental  
91 genomes of a hybrid *J. microcarpa* × *J. regia* (cv. Serr) at the chromosome-scale using long-read  
92 PacBio sequencing and optical mapping. They relied on the haplotype divergence between the two  
93 *Juglans* species and demonstrated an ongoing asymmetric fractionation of the two subgenomes  
94 present in *Juglans* genomes.

95 Here we report a new chromosome-level assembly of the walnut reference genome with  
96 unprecedented contiguity, Chandler v2.0, which we obtained by combining Oxford Nanopore  
97 long-read sequencing (Lu et al. 2016) with chromosome conformation capture (Hi-C) technology  
98 (Belton et al. 2012). Thanks to the increased contiguity of Chandler v2.0, we were able to  
99 substantially improve gene prediction accuracy, with new, longer gene models identified and many  
100 fewer artifacts compared to Chandler v1.0. Also, the availability of full, chromosomal sequences  
101 reveals new genetic diversity of Chandler, previously inaccessible through standard genotyping  
102 tools, and significant genetic differentiation between Western and Eastern walnuts at 195 genomic  
103 regions, including also loci involved in nut shape and harvest date. In the present research, we  
104 demonstrate the fundamental role of a chromosome-scale reference genome to integrate  
105 transcriptomics, population genetics, and proteomics, which in turn enable a better understanding  
106 of walnut biology.

## 107 **RESULTS AND DISCUSSION**

### 108 **Genome long-read sequencing and assembly**

109 To increase the contiguity of the Chandler genome, we first generated deep sequence coverage  
110 using Oxford Nanopore Technology (ONT), a cost-effective long-read sequencing approach that  
111 determines DNA bases by measuring the changes in electrical conductivity generated while DNA  
112 fragments pass a tiny biological pore (Leggett and Clark 2017). Since the release of the first plant  
113 genome assembly generated using ONT sequencing (Schmidt et al. 2017), this technology has  
114 been applied to sequence and obtain chromosome-scale genomes of many other plant species  
115 (Belser et al. 2018; Yasodha et al. 2018; Deschamps et al. 2018). In Persian walnut, ONT  
116 sequencing yielded 7,096,311 reads that provided 21.9 Gbp of sequence, or ~35X genome

117 coverage (assuming a genome size of 620 Mb). Read lengths averaged 3.1 kb, and the N50 read  
118 length was 6.7 kb, with the longest read being 992.2 kb.

119 One of the major limitations of long-read sequencing technologies is their high error rate, which  
120 can range between 5% and 15% for Nanopore sequencing (Rang et al. 2018). To overcome this  
121 limitation, we adopted the hybrid assembly technique incorporated into the MaSuRCA assembler,  
122 which combines long, high-error reads with shorter but much more accurate Illumina sequencing  
123 reads to generate a robust, highly contiguous genome assembly (Zimin et al. 2017). First, using  
124 the Illumina reads, we created 3.7 million 'super-reads' with a total length of 2.9 Gb. We then  
125 combined the super-reads with the ONT reads to generate 3.2 million mega-reads with a mean  
126 length of 4.7 kb, representing 24X genome coverage (**Supplemental Table S1**). Finally, we  
127 assembled the mega-reads to obtain the 'hybrid' Illumina-ONT assembly, which comprised 1,498  
128 scaffolds, 258 contigs, and 25,007 old scaffolds from Chandler v1.0 (**Table 1; Supplemental**  
129 **Table S2**).

130

131 **Table 1. Comparison among the four assemblies of Chandler.** Scaffolds shorter than 1,000 bp are not  
132 included in these totals.

| Assembly                   | Genome size (bp) | Number of Scaffolds | N50 (bp) G=620M |
|----------------------------|------------------|---------------------|-----------------|
| Chandler v1.0 <sup>1</sup> | 712,759,961      | 27,032              | 415,376         |
| Chandler v1.5 <sup>2</sup> | 651,682,552      | 4,402               | 687,445         |
| Chandler hybrid            | 573,816,693      | 3,497               | 1,361,770       |
| Chandler HiRise            | 573,917,993      | 2,656               | 31,492,331      |
| Chandler v2.0 (chrs)       | 547,778,456      | 16                  | 35,064,427      |

133 <sup>1</sup> (Martínez-García et al. 2016)

134 <sup>2</sup> (Stevens et al. 2018)

135

136 Even though the total number of scaffolds (> 1 Kb) was reduced by 80% compared to Chandler  
137 v1.0 (**Table 1**), the new hybrid assembly was still fragmented. To improve the assembly further  
138 and build chromosome-scale scaffolds, we applied Hi-C sequencing, which is based on proximity  
139 ligation of DNA fragments in their natural conformation within the nucleus (Belton et al. 2012).  
140 The HiRise scaffolding pipeline processed 356 million paired-end 100-bp Illumina reads to  
141 generate the HiRise assembly, which contained 2,656 scaffolds longer than 1 kb (**Table 1**). The  
142 top 17 scaffolds from this assembly spanned more than 90% of the total assembly length, with a  
143 scaffold length ranging from 19.6 to 45.2 Mb (**Supplemental Figure S1-S2**). As compared to the  
144 previous (1.0) assembly, the Chandler genome contiguity increased dramatically, with an N50 size  
145 98% higher than Chandler v1.0 and only 0.04% of the genome in gaps.

#### 146 **Validation of the HiRise assembly**

147 To assess the quality of the HiRise assembly, we used two independent sources of data. First, we  
148 used the single nucleotide polymorphism (SNP) markers mapped on the high-density genetic map  
149 of Chandler recently described by (Marrano et al. 2019). Out of the 8,080 SNPs mapped into 16  
150 linkage groups (LGs), 6,894 had probes aligning uniquely on the HiRise assembly with 98% of  
151 identity for more than 95% of their length. A total of 35 scaffolds of the HiRise assembly could be  
152 anchored to a chromosomal linkage group by at least one SNP (**Figure 1**). In particular, 13 LGs  
153 were spanned by a single HiRise scaffold, while two to three scaffolds each aligned the remaining  
154 three LGs.

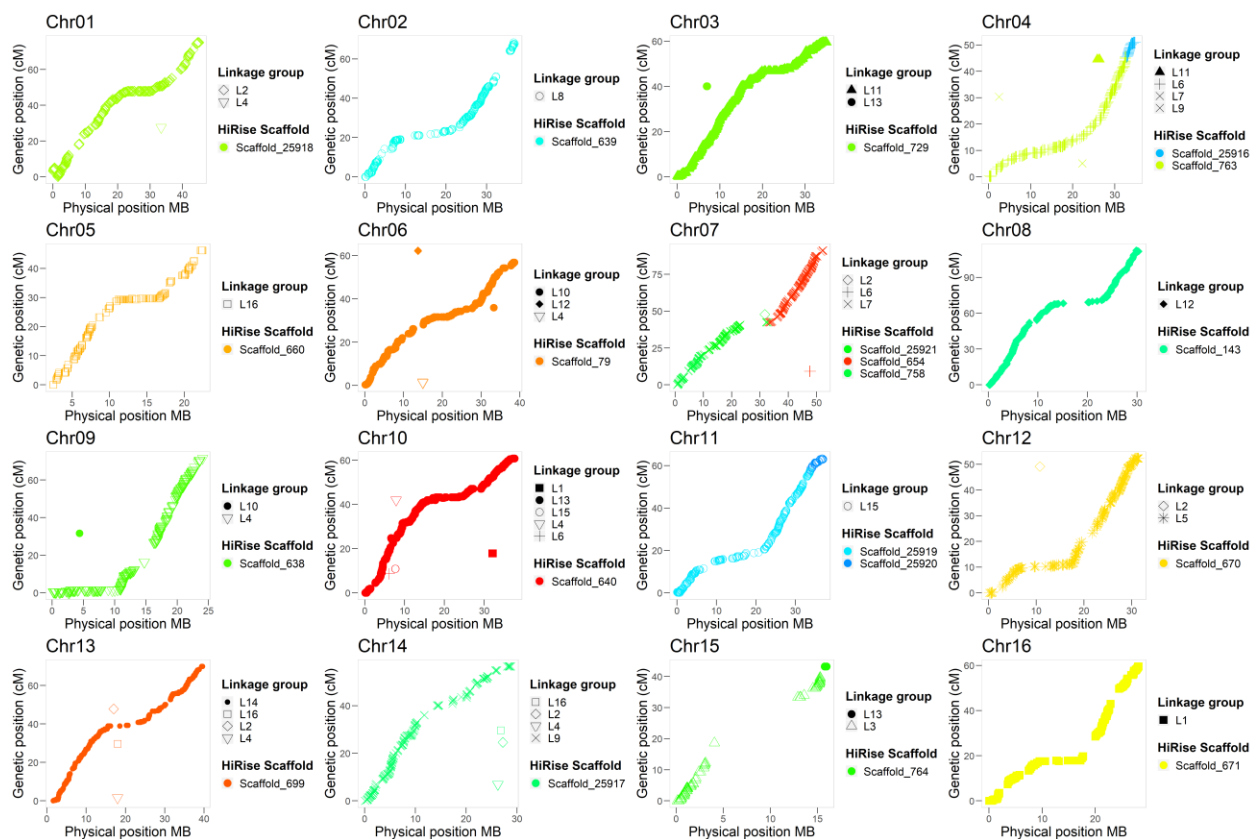



166 These 16 contiguous chromosomal scaffolds account for 95% of the final walnut reference genome  
167 v2.0, with an N50 size of 35 Mb. Chandler v2.0 has a total length of 576,258,700 bps, of which  
168 only 20.9 Mb are fragmented in 2,631 small unanchored scaffolds (> 1 kb; **Table 1**). The larger  
169 genome size of Chandler v2.0 compared to the recently published genome assembly of the cv. Serr  
170 (JrSerr\_v1.0; 534.7 Mb) (Zhu et al. 2019) can be explained by structural variation (e.g., copy  
171 number and presence/absence variants), whose central role in explaining intraspecific genomic and  
172 phenotypic diversity has been reported in different plant species (Springer et al. 2009; Marroni et  
173 al. 2014). In addition, the higher number of unanchored scaffolds in Chandler v2.0 compared to  
174 JrSerr\_v1.0 can represent autozygous genomic regions of Chandler, devoid of segregating markers  
175 and, therefore, difficult to anchor to linkage genetic maps (Luo et al. 2015), as also suggested by  
176 the higher fixation index ( $F$ ) observed in Chandler (0.03) than Serr (-0.29) in previous genetic  
177 surveys (Marrano et al. 2018).

178 We identified telomere sequences at both ends for nine of the chromosome scaffolds, on one end  
179 of the other seven chromosomes and one end of seven unanchored scaffolds. Also, all 16  
180 chromosomes had centromeric repeats in the middle, alongside regions with low recombination  
181 rates (**Figure 2**).

182 To assess the sequence accuracy of Chandler v2.0, we first compared the scaffold sequences of  
183 Chandler v2.0 with the previous version of the walnut reference genome, generating 838,173  
184 alignments with sequence identity averaging 94.11%. We then mapped the Illumina whole-  
185 genome shotgun data (Martínez-García et al., 2016) against the new chromosome-scale genome.  
186 The alignment resulted in 64,950,691,681 bps mapped, of which 407,450,406 were single-base  
187 mismatches, consistent with an Illumina sequence accuracy rate of 99.5%.

188

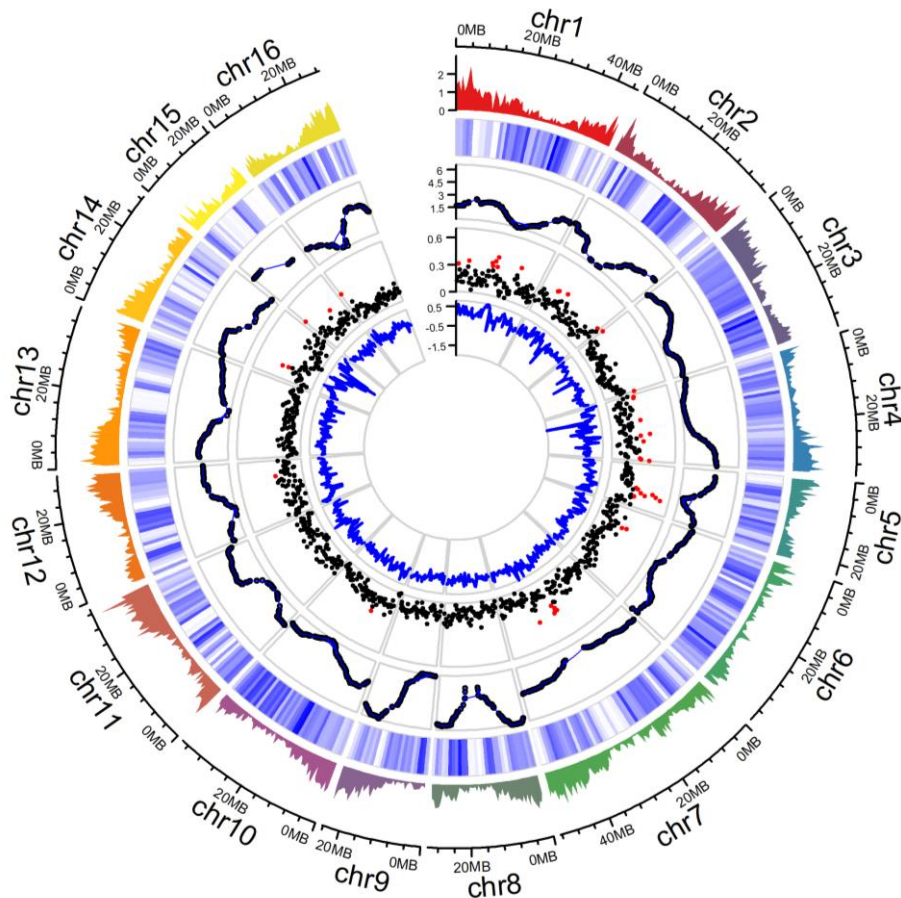

189

190 **Figure 2.** Summary of gene distribution and genetic diversity across the 16 chromosomes of Chandler v2.0.

191 Tracks from outside to inside: (i) gene density of Chandler v2.0 in 1-Mb windows; (ii) Chandler

192 heterozygosity in 1-Mb windows (white = low heterozygosity; blue = high heterozygosity); (iii)

193 Recombination rate for sliding windows of 10 Mb (average = 2.63 cM/Mb); (iv)  $F_{ST}$  in 500-kb windows.

194 Windows in the 95 percentiles of the  $F_{ST}$  distribution are highlighted in red; (v) ROD values for 500-kb

195 windows.

196

## 197 Repeat annotation

198 Almost half (49.68%) of the new Chandler v2.0 is repetitive, similarly to the previous version of

199 the walnut reference genome (51.19%). As in most plant genomes, interspersed repeats (45.13%)

200 were the most abundant type of repeats, with retrotransposons at 18.55% and DNA transposons at  
201 3.05%. *Gypsies* (6.58%) and *Copias* (4.1%) were the most represented classes of long-terminal  
202 retrotransposons (LTR), and, though widely dispersed throughout the genome, they were  
203 distributed differently along the 16 chromosomes (**Supplemental Figure S4**): the *Gypsies* LTRs  
204 were more abundant alongside the centromeres, where, instead, the density of the *Copia* LTRs  
205 decreased, consistent with (Zhu et al. 2019). L1/LINE (long-interspersed nuclear elements), which  
206 possess a poly(A) tail and two open reading frames (ORFs) for autonomous retrotransposition,  
207 was the largest class of non-LTRs at 6.98% of the genome. Simple repeats (4.29%) and low-  
208 complexity regions (0.26%) were also found.

### 209 **PacBio IsoSeq sequencing and gene annotation**

210 A fragmented reference genome can severely hamper the accuracy of gene prediction, because  
211 many genes will be broken across multiple small contigs (false negatives), and because multiple  
212 fragments of the same gene may be annotated separately (false positives). Also, transcriptome  
213 assemblies generated using second-generation (Illumina) sequencing data are likely to miss many  
214 transcripts due to the very short read lengths (Minoche et al. 2015).

215 To improve the gene prediction accuracy of Chandler v2.0, we used the “Isoform Sequencing”  
216 (Iso-Seq) method, developed by Pacific Biosciences (PacBio), which can generate full-length  
217 transcripts up to 10 kb, allowing for accurate determination of exon-intron structure by alignment  
218 of the transcripts to the assembly (Rhoads and Au 2015). The high error rate of PacBio sequencing  
219 can be greatly reduced using circular consensus sequence (CCS), in which a transcript is  
220 circularized and then sequenced repeatedly to self-correct the errors. We applied PacBio IsoSeq to  
221 sequence full-length transcripts from nine tissues, chosen to cover most of the transcript diversity  
222 in walnut (**Supplemental Table S3**). Across the four SMRT cells, we obtained 26,328,087

223 subreads with a mean length of 1,188 bp (**Supplemental Table S4**) and CCSs ranging from 13K  
224 to 142K per library (**Supplemental Table S5**). Out of the 745,730 full-length non-chimeric (FLnc)  
225 transcripts, 68,225 were classified as high quality, FL (HQ FL) consensus transcript sequences,  
226 with an average length of 1,357 bp (**Supplemental Table S5**). Catkin 1-inch elongated (CAT1),  
227 shoot, and root yielded the lowest number of HQ FL transcripts, while pollen and leaf had the  
228 lowest number of HQ consensus clusters obtained per CCS after polishing (**Supplemental Table**  
229 **S5**). These results can be explained by lower cDNA quality or fewer inserts of full-length  
230 transcripts from these tissues during the cDNA pooling and library preparation. Nevertheless, more  
231 than 99% of the HQ FL transcripts aligned onto the new chromosomal-level walnut reference  
232 genome (**Supplemental Table S6**).

233 By combining the HQ FL transcripts with available *Juglans* transcriptome sequences, we identified  
234 40,491 gene models, which are more than those annotated in Chandler v1.0 but fewer than the  
235 predicted genes in the NCBI RefSeq *J. regia* annotation generated with the first version of the  
236 reference genome (**Table 2**). This result suggests that the new chromosome-scale genome, along  
237 with the availability of full-length transcripts, allowed us to identify genes missed during the  
238 annotation of Chandler v1.0, as well as to remove false-positive predictions. Also, the mean gene  
239 length in Chandler v2.0 was higher than the previous gene annotations (**Table 2**), a consequence  
240 of the increased contiguity of the new chromosome-scale reference genome.

241

242 **Table 2.** Statistics on the gene annotation of Chandler v2.0 compared to the previous gene annotations of  
243 the Chandler genome.

|                        | Chandler v2.0 | Chandler v1.0* | Chandler RefSeq v1.0 |
|------------------------|---------------|----------------|----------------------|
| <b>Number of genes</b> | 40,491        | 32,496         | 41,188               |

|                                 |         |         |         |
|---------------------------------|---------|---------|---------|
| <b>Average gene length (bp)</b> | 5,776   | 4,358   | 4,641   |
| <b>Single-exon transcripts</b>  | 6,616   | 6,247   | 6,749   |
| <b>Average CDS length (bp)</b>  | 1,335   | 1,222   | 1,336   |
| <b>Number of exons</b>          | 244,238 | 172,273 | 230,261 |
| <b>Average exon length (bp)</b> | 257.1   | 229.5   | 314     |
| <b>Number of Introns</b>        | 203,157 | 139,775 | 181,419 |
| <b>Average intron length</b>    | 856.9   | 730     | 835     |

244 \* (Martínez-García et al. 2016)

245

246 The average gene density of Chandler v2.0 was 19.28 genes per 100 kb, with higher gene content  
247 in the proximity of telomeric regions (**Figure 2**), consistent with other plant genomes (Maccaferri  
248 et al. 2019; Linsmith et al. 2019). In addition, 92% (37,102) of the predicted gene models of  
249 Chandler v2.0 was supported by expression data, and 97% showed high similarity with a protein-  
250 coding transcript from either the *J. regia* RefSeq v1 gene set or a protein from the wider NCBI  
251 RefSeq plant database (**Supplemental Table S7**), highlighting the accuracy and robustness of the  
252 Chandler v2.0 genome annotation. Overall, Chandler v2.0 contained 339 newly predicted gene  
253 models, with a mean length of 1,533 bp. Of these new predicted gene models, 150 (44%) and 329  
254 (97%) were supported by PacBio IsoSeq and Illumina RNA-seq data (Martínez-García et al.,  
255 2016), respectively. Thus, the failure to identify these genes in Chandler v1.0 was most likely  
256 related to its low contiguity than to the lack of the gene transcripts in the RNA-seq data.

257 Out of the 41,081 transcripts identified, 84% were multi-exonic, with, on average, 5.94 exons each  
258 and a mean exon length of 257.2 bp (**Table 2**). The mean number of introns per gene was 5.9, with  
259 a length ranging from 20 bp to 493 kb. These values are similar to those observed in the previous  
260 gene annotations of Chandler, except for the number of exons and introns which was higher in

261 Chandler v2.0. Also, introns were longer, on average, contributing to the higher mean gene length  
262 observed in Chandler v2.0. The majority of intron/exon junctions were GT/AG-motif (98.2%),  
263 even though alternative splicing with non-canonical motifs was also observed (GC/AG – 0.8%;  
264 AT/AC – 0.11%). Almost 90% (36,438) of the coding sequences were full-length with canonical  
265 start and stop codons, while 4,525 presented either a start or a stop codon. This result represents a  
266 great improvement compared to Chandler v1.0, where only 48% of the predicted gene models were  
267 complete (Martínez-García et al. 2016).

268 Also, we observed that 568 gene models had from two to four transcript isoforms each, with a  
269 mean length of 7,080 bp. Out of the 1,158 isoforms identified, 339 were covered by FL HQ  
270 transcripts in at least one tissue, while 835 were expressed in at least one of the 20 tissues  
271 (Martínez-García et al., 2016), which most likely covered higher gene diversity compared to the  
272 nine tissues used for PacBio IsoSeq. On average, the Illumina isoforms (7,220 bp) were longer  
273 than the PacBio isoforms (6,044 bp). By running the EnTAP functional annotation pipeline with  
274 the entire NCBI RefSeq plant database (Hart et al. 2018), we observed that 672 isoforms were  
275 annotated with a plant protein, while the remaining 486 transcript isoforms were not identified in  
276 the previous walnut gene annotation.

277 Of the 41,103 gene models, 83% were annotated with a plant protein, and 84% had a known Pfam  
278 domain. Also, 33,034 models were annotated with 8,244 different Gene Ontology (GO) terms. The  
279 three most common biological processes were regulation of transcription (2%), defense response  
280 (1.43%), and DNA recombination (1.2%; **Supplemental Figure S5**). ATP binding (7.7%), metal  
281 ion binding (7.1%) and DNA-binding transcription factor activity (3.7%; **Supplemental Figure**  
282 **S6**) were the most abundant molecular functions, while nucleus (13%), integral component of

283 membrane (10.3%) and plasma membrane (8%) were the top three cellular components  
284 **(Supplemental Figure S7)**.

285 The majority (95%) of the 1,440 core genes in the embryophyte dataset from Benchmarking  
286 Universal Single-Copy Orthologs (BUSCO) were identified in both the new Chandler genome  
287 assembly and gene space v2.0. Also, 88% of both rosids and green sets of core gene families  
288 (coreGFs) were identified in the gene annotation, confirming the high-quality and completeness  
289 of the gene space of Chandler v2.0.

### 290 **Improved assessment of proteomes with the complete genome sequence**

291 After confirming the importance of a chromosome-scale reference genome for the improvement  
292 of gene prediction accuracy, we studied the impact of a contiguous genome on proteomic analysis.  
293 A virtual proteome, which includes all protein sequences predicted from a reference genome, is  
294 generally used to map and assign the peptides detected in mass spectrometry (MS) to specific  
295 protein-coding genes. Therefore, a fragmented assembly of the reference genome can lead to an  
296 inaccurate prediction of a species' proteome and, then, a miss-identification of the proteins  
297 expressed in specific tissues at particular stages (Jamet and Santoni 2018).

298 We analyzed the proteomic data generated from samples encompassing different developing stages  
299 of the male walnut flower (catkin) and pure pollen, by using the virtual proteomes predicted from  
300 the gene annotation of the new chromosome-scale genome and Chandler v1.0 (NCBI RefSeq).  
301 Considering all tissues analyzed, we identified fewer unique peptides (43,083) with the new  
302 chromosome-scale walnut genome than with Chandler v1.0 (44,679). Also, 6,966 unique proteins  
303 were detected with Chandler v2.0 against the 8,802 found using version 1 as a search database  
304 **(Supplemental Table S8-S9)**. Most likely, the NCBI proteomic database based on the fragmented

305 Chandler v1.0 included artifacts resulting from an overestimation of the protein-coding genes.  
306 Therefore, the new chromosome-scale genome allows accurate estimation of the proteomic  
307 changes occurring in the different vegetative and reproductive stages of walnut, which is  
308 fundamental to fully understand the molecular bases of the observed phenotypic traits.  
309 Sample clustering according to their protein constituents and levels showed greater similarity  
310 between immature and mature catkins and a more distinct profile between senescent catkins and  
311 pure pollen (**Figure 3**).

312

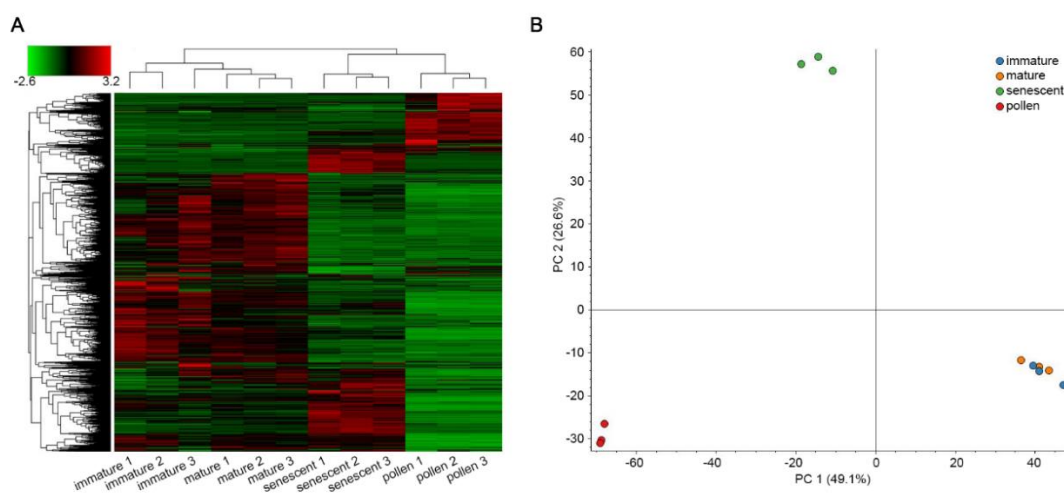

313

314 **Figure 3.** Clustering of the samples used in the proteomic analysis. (A) Hierarchical clustering based on  
315 Euclidian distances of normalized abundances of detected proteins. Samples are represented in columns  
316 and proteins in rows. (B) Principal component analysis of the 12 samples analyzed, clustering according to  
317 tissue type.

318

319 Given that ~2% of walnut consumers have high risk of developing allergies to nuts or pollen (Costa  
320 et al. 2014), we searched the four developed proteomes for allergenic proteins listed in the  
321 WHO/IUIS Allergen Database ([www.allergen.org](http://www.allergen.org); **Supplemental Table S10**), and additional



322 proteins not yet registered in the allergen database but predicted in Chandler v2 as potential  
323 allergens (**Supplemental Table S9**). Four of the eight recognized allergenic proteins were detected  
324 in at least one of the catkin developmental stages, with Jug\_r\_5 (XP\_018825777 | *Jr12\_10750*)  
325 and Jug\_r\_7 (XP\_018808763 | *Jr07\_28960*) present in all sample types, including pollen  
326 (**Supplemental Table S10**). Three of the new potential allergens (**Supplemental Table S10**) are  
327 encoded by genes adjacent to known allergen-coding sequences, likely indicating gene  
328 duplications. Also, we discovered that the gene locus *Jr12\_05180* encodes a non-specific lipid  
329 transfer protein (nsLTP; Jug\_r\_9 | XP\_018813928), a potential allergen highly expressed during  
330 catkin maturation and in pollen (**Supplemental Table S10-11**). In particular, Jug\_r\_9 was the most  
331 abundant protein in mature and senescent catkins, and the second-most abundant in pure pollen  
332 (**Supplemental Table S10-11**). Another interesting allergen similar to Jug\_r\_9 (same eight  
333 cysteine configuration) is XP\_018814382 | *Jr03\_26970*; it decreases as the catkin matures, and is  
334 entirely absent in pollen (**Supplemental Table S10-11**). Similarly, polyphenol oxidase (PPO,  
335 XP\_018858848 | *Jr03\_06780*) is high in the immature catkin and almost absent in the pollen. The  
336 integration of this proteomic data with previously published transcriptomic data obtained from 20  
337 walnut tissues (Martínez-García et al. 2016) shows high reproducibility between the methods. In  
338 both datasets, allergens Jug\_r\_1, 4, and 6 were not detected in catkins, while the new putative  
339 allergen Jug\_r\_9 was highly expressed in catkins (**Supplemental Tables S11-S12**). Also,  
340 *Jr12\_05180* transcripts were not detected in any of the 20 tissues but catkin, thus confirming the  
341 strong specificity of Jug\_r\_9 for catkin and pollen tissue (**Supplemental Table S12**). Modeling  
342 the structure of this putative allergen reveals four predicted disulfide bonds, potentially conferring  
343 heat and protease-resistance, and further suggesting allergenic properties (**Figure 4**). Future  
344 studies will clarify the functional role of this protein and its allergenic nature.

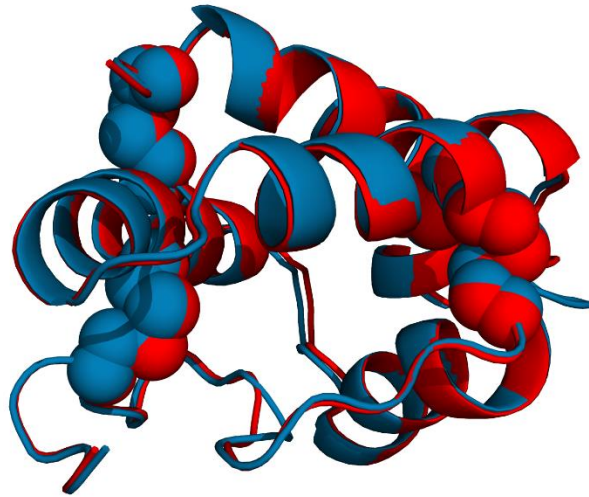

345

346 **Figure 4.** Modeled structure of the putative new allergen encoded by *Jr12\_05180*. The compact structure  
347 is stabilized by four disulfide bonds, common in other allergenic proteins. The model in blue is  
348 superimposed with a homologous allergen from lentil (PDBid:2MAL) represented in red. Structure  
349 rendered with Pymol 2.3 ([www.pymol.org](http://www.pymol.org)).

350

351 The detection of new potential walnut allergens confirms the positive impact of Chandler v2.0 on  
352 proteomic studies in walnut, by providing a clearer and more precise organization of the CDSs  
353 within a genomic vicinity than the previous fragmented genome assembly v1.0.

#### 354 **Chandler genomic diversity**

355 By anchoring the HiRise assembly to the Chandler genetic map (Marrano et al. 2019), we observed  
356 highly homozygous regions in Chandler, especially on Chr15, where the genetic gap spanned 14.5  
357 cM, corresponding to a physical distance of 9.1 Mb. A large gap on Chr15 (9.23 cM – 1.5 Mb)  
358 was also observed by (Luo et al. 2015), which suggested inbreeding as a possible cause for the  
359 lack of segregating loci in this region in Chandler, whose parents shared Payne as an ancestor. To

360 confirm the autozygosity of Chandler on Chr15, we used the Illumina whole-genome shotgun data  
361 of Chandler and the identified polymorphisms to study its genetic diversity across the new  
362 chromosome-scale genome. We identified 2,205,835 single heterozygous polymorphisms on the  
363 16 chromosomal pseudomolecules, with an SNP density of 4.0 SNPs per kb (**Figure 2**;  
364 **Supplemental Table S13**). Fifty-six 1-Mb-regions exhibited less than 377.5 SNPs (10<sup>th</sup> percentile  
365 of the genome-wide SNP number distribution), and chromosomes 15, 1, 7, and 13 were the top  
366 four chromosomes in the number of low heterozygous regions (**Supplemental Table S14**). In  
367 particular, Chr15 presented nine 1-Mb windows with a significantly low number of  
368 polymorphisms, five of which span 4 Mb at the end of the chromosome. In these nine low  
369 heterozygous regions, we found 1,536 SNPs in total (**Figure 2**), of which only 25 were tiled on  
370 the Axiom *J. regia* 700K SNPs array. The absence of these polymorphisms segregating in  
371 Chandler in the SNP array could be related to either a failed identification during the SNP calling  
372 due to the highly fragmented reference genome v1.0 or with the SNP exclusion during the filtering  
373 process applied to build the genotyping array (Marrano et al. 2018). The low number of Chandler  
374 heterozygous SNPs in the array affected the end of Chr15 the most, causing a reduction in the  
375 genetic length of the corresponding linkage group (**Figure 1**), as well as leaving unexplored 4 Mb  
376 of Chandler genetic variability, which is now accessible thanks to the new chromosome-scale  
377 reference genome. The failure to anchor seven of the scaffolds with telomeric sequences can be  
378 explained by the missed detection of terminally located highly homozygous regions during genetic  
379 map constructions, due to the absence of crossing-over events with heterozygous flanking markers.

380 Due to the evidence of whole-genome duplication in *Juglans* genomes (Luo et al. 2015), we  
381 searched for conserved regions of synteny between Chr15 and its homologous regions in the  
382 genome, to study their level of divergence and identify other evolutionary forces as possible causes

383 of the localized reduction of heterozygosity on Chr15. Of the 5,739 pairs of paralogous genes  
384 (8,701 genes; **Supplemental Figure S8**) identified in Chandler v2.0, 448 included genes on Chr15,  
385 and 389 of these have their respective paralogues on Chr6 (**Supplemental Figure S9**), in line with  
386 what was already reported by (Luo et al. 2015). The Chr06-Chr15 pairs of paralogous genes  
387 showed average values of divergence indexes ( $K_S = 0.38$ ;  $K_A = 0.13$ ) similar to the ones observed  
388 genome-wide for other syntelogs ( $K_S = 0.4$ ;  $K_A = 0.09$ ). Similar values of divergence were also  
389 observed for the 178 Chr06-Chr15 syntelogs (171 genes) falling within the nine low heterozygous  
390 regions on Chr15 ( $K_S = 0.4$ ,  $K_A = 0.1$ ), excluding different evolutionary rates or positive selection  
391 for these regions, and leaving inbreeding as the most reasonable explanation. Other than  
392 paralogous genes, we found 393 singletons genes in the low heterozygous regions on Chr15 of  
393 Chandler. These genes are involved in different biological processes, many of which related to  
394 signal transduction, protein phosphorylation, and response to environmental stimuli  
395 (**Supplemental Table S15**).

396 We further investigated the contribution of inbreeding to the high level of autozygosity on Chr 15  
397 by visualizing the inheritance of haplotype-blocks (HB; genomic regions with little recombination)  
398 across the Chandler pedigree (**Figure 5B, Supplemental Figure S10**). We observed that Payne  
399 accounts for the entire Chandler genetic makeup (19 HBs for the total length of Chr15) inherited  
400 from Pedro (mother), where only one HB (2,08 Mb) shared the same allele of Conway-Mayette  
401 (maternal-grandfather; **Figure 5A**). Regarding the paternal genetic makeup of Chandler, 13 out of  
402 19 HBs (9,05 Mb) on Chr15 inherited Payne alleles, providing further evidence of high inbreeding  
403 on this chromosome (**Figure 5A**). This is even more evident in assessing the number of alleles  
404 matching between Payne and Chandler across the genome: Chr15 (14 HBs for a total of 13,95 Mb;  
405 **Figure 6**) shares full allele identity with Payne for almost its entire length. Such allele matching

406 between Chandler and its ancestor Payne also occurs on Chr1 (9 HBs for a total of 8,44 Mb), Chr4  
 407 (6 HBs - 7,68 Mb), Chr7 (21 HBs - 21,62Mb) and Chr14 (7 HBs – 12,29 Mb). These results  
 408 confirm a high level of inbreeding in many genomic regions of Chandler (**Supplemental Figure**  
 409 **S10**) and support the crucial role of Chandler v2.0 for understanding trait genetic inheritance in  
 410 walnut.

411

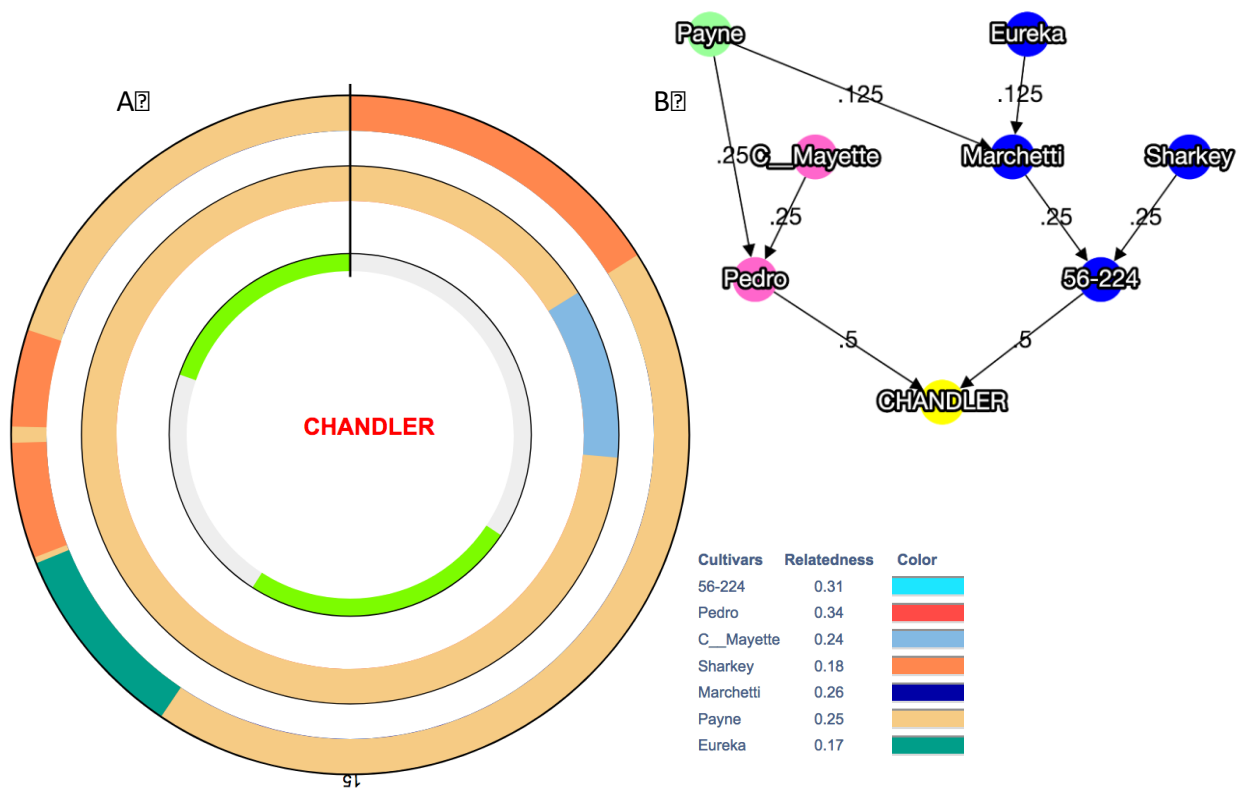

412

413 **Figure 5.** Graphical visualization of haplotype-blocks (HB) inheritance on Chr15 along with the Chandler  
 414 pedigree. **(A)** The inner-circle highlights in grey two regions of heterozygosity (5 HB the first and 7 HB  
 415 the second), and in light green two regions of homozygosity (3 HB the first and 4 HB the second). The  
 416 circle in the middle shows maternally inherited HBs, while the HBs inherited through the paternal line are  
 417 visualized in the outer circle. Payne’s haplotypes are clearly present in both parental lines. **(B)** Chandler  
 418 pedigree, where Pedro is the maternal line and 56-224, the paternal line.

419

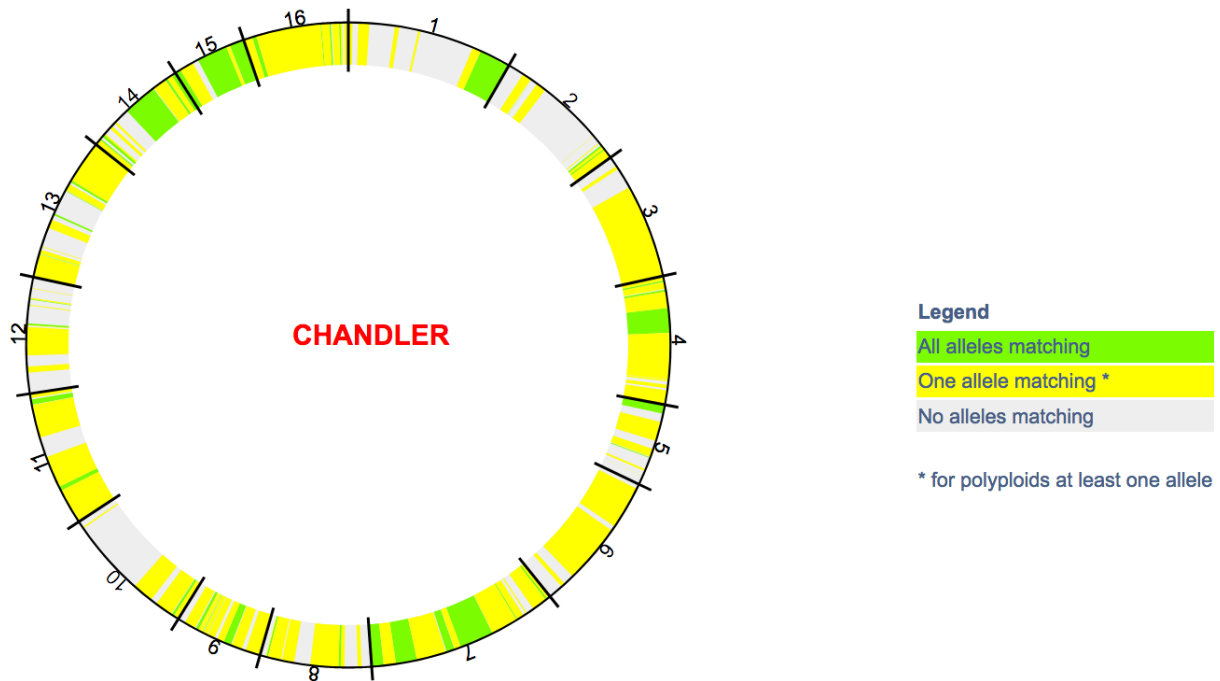

420

421 **Figure 6.** Graphical visualization of allele identity between Chandler and its ancestor Payne for all 16  
422 chromosomes of Chandler.

423

#### 424 **Genomic comparison between Eastern and Western walnuts**

425 Even though numerous surveys regarding genetic diversity within walnut germplasm collections  
426 have been reported so far (Aradhya et al. 2010; Ruiz-Garcia et al. 2011), comparative analyses at  
427 the population level and genome scans for signatures of selection are still missing in Persian  
428 walnut. The availability of a chromosome-scale reference genome enables exploration of the  
429 patterns of intraspecific variation at the genomic level, providing new insight on the extraordinary  
430 phenotypic diversity present within *J. regia*.

431 We used the resequencing data generated for 23 founders of the Walnut Improvement Program of  
432 the University of California, Davis (UCD-WIP; **Supplemental Table S16**) (Stevens et al. 2018)  
433 to study the genome-wide genetic differentiation among walnut genotypes of different  
434 geographical provenance. We identified 14,988,422 SNPs, and over 97% of them were distributed  
435 on the 16 chromosomal pseudomolecules, with 9.4 polymorphisms per kb. A hierarchical  
436 clustering analysis (**Supplemental Figure S11**) divided the 23 founders into two major groups,  
437 including genotypes from western countries (USA, France, and Bulgaria) and Asia (China, Japan,  
438 Afghanistan), respectively, as previously reported (Marrano et al. 2018; Dangl et al. 2005). High  
439 phenotypic diversity for many traits of interest in walnut, such as phenology, nut quality, and yield,  
440 has been observed within and between germplasm collections from Western and Eastern countries  
441 (McGranahan and Leslie 1991). Walnut trees from Asia are noted for their lateral fruitfulness and  
442 precocity, rarely observed in the USA and western Europe, so that they have been used as a source  
443 of these phenotypes in different walnut breeding programs (Bernard et al. 2018b).

444 At a genomic level, we found a moderate differentiation ( $F_{ST} = 0.15$ ) between Western and Eastern  
445 genotypes, except for 195 genomic windows (100 kb) that showed substantially high population  
446 differences ( $F_{ST} \geq 0.36$ ; top 5% in the whole genome). In particular, chromosomes 7, 5, 1, 4, and  
447 2 presented about 70% of the divergent sites (**Figure 2; Supplemental Figure S12**). As suggested  
448 by the mean reduction of diversity coefficient (ROD) value (0.41), in most of the genomic regions  
449 highly differentiated, the UCD-WIP founders from the USA and Europe showed lower nucleotide  
450 diversity ( $\pi = 2.5 \times 10^{-4}$ ) than the Asian genotypes ( $\pi = 5.0 \times 10^{-4}$ ), consistent with (Bernard et al.  
451 2018a) (**Figure 2; Supplemental Figure S12**). The proximity of our eastern genotypes to the  
452 supposed walnut center of domestication in Central Asia can explain the high level of diversity  
453 observed in this subgroup.

454 More than 60% (122) of the highly differentiated windows showed a negative value of Tajima's  
455 D in the EU/USA subgroup ( $D_{Occ} = -1.12$ ), thus, suggesting that selection has been likely acting  
456 on these genomic regions in the Western genotypes (**Supplemental Figure S12**). Here we found  
457 743 genes, with GO biological categories mostly related to signal transduction, embryo  
458 development, and response to stresses (**Supplemental Table S17**). Ten candidate selective sweeps  
459 ( $D_{Asia} = -0.54$ ) were also observed in the Eastern group (**Supplemental Figure S12**), which  
460 included 57 predicted genes, related to terpenoid biosynthesis, post-embryonic development, and  
461 signal transduction (**Supplemental Table S18**).

462 Recently, many marker-trait associations have been reported for different traits of interest in  
463 walnut, such as leafing date, nut-related phenotypes, and water use efficiency (Arab et al. 2019;  
464 Famula et al. 2019; Marrano et al. 2019). We looked to see if any of these trait-associated SNPs  
465 fell within regions highly differentiated between Western and Eastern genotypes. Three loci  
466 associated with shape index, nut roundness, and nut shape (Arab et al. 2019) are located in two  
467 genomic regions on chromosome 3 and 4 with significantly high values of  $F_{ST}$  (**Supplemental**  
468 **Table S19**). In both of these regions, Western genotypes presented lower genetic diversity and  
469 lower values of Tajima's D than the Eastern walnuts. These findings may suggest that, while a  
470 selective pressure for nut shape may have occurred in the EU/USA subgroups, higher phenotypic  
471 variability can be expected for these traits in the Eastern countries. We also found that the locus  
472 AX-170770379, strongly associated with harvesting date (Marrano et al. 2019), falls within a  
473 genomic region on Chr1 with an  $F_{ST}$  value equal to 0.39 and lower genetic diversity in the western  
474 genotypes (ROD = 0.63; **Supplemental Table S19**). Looking at the phenotypic effect of this SNP  
475 on the harvest date of the 23 founders, we observed that most of the western genotypes are later  
476 harvesting than the eastern (**Supplemental Figure S13**), suggesting differences in the timing of



477 phenological events between these two groups as adaptation to the different climate conditions  
478 present in their countries of origin (Gauthier and Jacobs 2011).

479 These results confirm the central role of a chromosome-scale genome assembly for population  
480 genetics studies, which are fundamental to study how the environment and human selection  
481 impacted walnut biology. Future resequencing projects involving larger walnut collections and  
482 covering a wider area of the global walnut distribution are necessary to confirm and interpret the  
483 observed genomic differentiation between Western and Eastern walnuts, likely helping to  
484 understand the role of this genomic divergence in the evolutionary history of Persian walnut.

485

## 486 **METHODS**

### 487 **Oxford Nanopore sequencing and assembly**

488 High molecular weight (HMW) DNA for Nanopore sequencing (Oxford Nanopore Technologies  
489 Inc., UK) was isolated through a nuclei extraction and lysis protocol. First, mature leaf tissue from  
490 the same tree used for the original *J. regia* genome (Martínez-García et al. 2016) was homogenized  
491 with mortar and pestle in liquid nitrogen until well ground, then added to the Nuclei Isolation  
492 Buffer (Workman et al. 2018), and stirred at 4°C for 10 minutes. The cellular homogenate was  
493 filtered through 5 layers of Miracloth (Millipore-Sigma) into a 50 mL Falcon tube, then centrifuged  
494 at 4°C for 20 minutes at 3000 x g. This speed of centrifugation was selected based on the estimated  
495 walnut genome size of 1 Gb (Zhang et al. 2012). Extracted nuclei were then lysed for 30 minutes  
496 at 65°C in the SDS-based lysis buffer described by (Mayjonade et al. 2017). Potassium acetate  
497 was added to the lysate to precipitate residual polysaccharides and proteins. The sample was  
498 incubated for 5 minutes at 4°C and then centrifuged at 4°C for 10 minutes at 2400 x g. After

499 removing the supernatant, genomic DNA (gDNA) was ethanol precipitated, and then eluted in 10  
500 mM Tris-Cl. Further purification of the gDNA was then performed using a Zymo Genomic DNA  
501 Clean and Concentrate column.

502 One  $\mu$ g of the isolated gDNA was prepared for sequencing using the Ligation sequencing kit  
503 (LSK108, Oxford Nanopore) following manufacturer's protocol with an optimized end repair (100  
504  $\mu$ l sample, 14  $\mu$ l enzyme, 6  $\mu$ l enzyme, incubated at 20°C for 20 minutes then 65°C for 20 minutes).  
505 Libraries were sequenced for 48 hours on the Oxford Nanopore Mk1B MinION platform with the  
506 R9.4 chemistry on eight flowcells. Raw fast5 data was base-called using Albacore version 1.25.

507 The ONT data and Illumina reads from (Martínez-García et al. 2016) were combined using the  
508 assembly algorithm implemented in MaSuRCA v3.2.2 (Zimin et al. 2013). Super-reads were  
509 constructed using a k-mer size of 41 bp. De-duplicated scaffolds were aligned onto the previously  
510 finished *J. regia* chloroplast genome (Martínez-García et al. 2016) using "minimap2 -x asm5", as  
511 well as to a database of 223 finished plant mitochondria (downloaded from NCBI RefSeq) using  
512 blastn with default parameters.

### 513 **Hi-C sequencing**

514 A Hi-C library was prepared by Dovetail Genomics LLC (Santa Cruz, CA, USA) as described  
515 previously (Lieberman-Aiden et al. 2009). Briefly, for each library, chromatin was fixed in place  
516 with formaldehyde in the nucleus and then extracted. Fixed chromatin was digested with DpnII,  
517 the 5' overhangs filled in with biotinylated nucleotides, and then free blunt ends were ligated. After  
518 ligation, crosslinks were reversed and the DNA purified from protein. Biotin that was not internal  
519 to ligated fragments was removed from the purified DNA. Purified DNA was then sheared to ~350  
520 bp mean fragment size. Sequencing libraries were generated using NEBNext® Ultra™ enzymes

521 and Illumina-compatible adapters. Biotin-containing fragments were isolated using streptavidin  
522 beads before PCR enrichment of each library. The libraries were then sequenced on the Illumina  
523 HiSeq4000 platform.

524 The hybrid ONT assembly, Illumina shotgun reads (Martínez-García et al. 2016), and Dovetail Hi-  
525 C library reads were used as input data for the scaffolding software HiRise, which uses proximity  
526 ligation data to scaffold genome assemblies (Putnam et al. 2016). Shotgun and Dovetail Hi-C  
527 library sequences were aligned to the hybrid ONT assembly using a modified SNAP read mapper  
528 (<http://snap.cs.berkeley.edu>). The separations of Dovetail Hi-C read pairs mapped within the ONT  
529 scaffolds were analyzed by HiRise to produce a likelihood model for the genomic distance between  
530 read pairs, and the model was used to identify and break putative mis-joins, to score prospective  
531 joins, and make joins above a threshold. After scaffolding, Illumina shotgun sequences were used  
532 to close gaps between contigs, resulting in an improved HiRise assembly.

### 533 **Validation and anchoring of the HiRise assembly to Chandler genetic maps**

534 The HiRise assembly was first anchored to the Chandler genetic map obtained by (Marrano et al.  
535 2019) from a 312 offspring F<sub>1</sub> population ‘Chandler x Idaho’ genotyped with the latest Axiom *J.*  
536 *regia* 700K SNP array. SNP probes (71-mers including the SNP site) from the Axiom *J. regia*  
537 700K SNP array were aligned onto the HiRise assembly filtering out alignments with  
538 probe/reference identity lower than 98%, covering less than 95% of the probe length or aligning  
539 multiple times on the genome. Retained markers with a unique segregation profile were then used  
540 to anchor the HiRise scaffolds. The same procedure was also followed to anchor the HiRise  
541 assembly to the Chandler genetic map used to construct a walnut bacterial artificial chromosome  
542 (BAC) clone-based physical map by (Luo et al. 2015). The final ordering of scaffolds was

543 performed by taking into consideration the marker genetic map position, and, in the final sequence,  
544 consecutive scaffolds were separated by sequences of 100,000 Ns.

545 The tandem repeat finder program (trf v4.09; (Benson 1999) was run using the recommended  
546 parameters (max mismatch delta PM PI minscore maxperiod, 2 7 7 80 10 50 500 resp.) to identify  
547 repeat elements up to 500 bp long. A histogram of repeat unit lengths was generated, and peaks at  
548 7, 29, 33, 44, 154, and 308 bp were identified. From this data, a consensus sequence corresponding  
549 to each peak was selected. All of these repeat sequences were aligned onto the HiRise assembly  
550 using ‘nucmer’ from the MUMmer4 package (Marçais et al. 2018) with a minimum match length  
551 of 7 to capture the telomeric repeat. Based on the positions of these alignments along the  
552 chromosomes and contigs, we identified the 7-mer as the telomeric repeat and the 154-mer and  
553 308-mer as centromeric repeats.

554 Recombination rate was estimated within sliding windows of 10 Mb with a step of 1 Mb along the  
555 chromosome sequence by using the high-density genetic map of Chandler (Marrano et al. 2019)  
556 and the R/MareyMap package v 1.3.4 (Rezvoy et al. 2007). To evaluate Chandler v2.0 error rate,  
557 the two assemblies, Chandler v1.0 and 2.0, were aligned to each other using the ‘nucmer’ program  
558 (Marçais et al., 2018).

## 559 **RNA preparation**

560 Five walnut tissues (leaf, catkin 1-inch elongated; catkin 3-inches elongated, pistillate flower, and  
561 pollen) were collected from ‘Chandler’ trees at the UCD walnut orchards. Four additional samples  
562 (somatic embryo, callus, shoot, and roots) were taken from tissue culture material of ‘Chandler’.  
563 Several grams of each tissue were ground in liquid nitrogen and with insoluble  
564 polyvinylpyrrolidone (PVPP; 1% w/w). RNA was isolated using the PureLink™ Plant RNA

565 Reagent (Invitrogen™, Carlsbad, CA) following the manufacturer's instructions, but with an  
566 additional end wash in 1 mL of 75% Ethanol. For root tissue only, RNA isolation was performed  
567 using the MagMAX™ mirVana™ Total RNA Isolation Kit (Applied Biosystems™, Foster City,  
568 CA) as per protocol, except for the lysis step. A different lysis buffer was created adding 100 mg  
569 of sodium metabisulfite to 10 mL of guanidine buffer (guanidine thiocyanate 4M, sodium acetate  
570 0.2M, EDTA 25 mM, PVP-40 2.5%, pH 5.0) and 1 mL of nuclease-free water. Then, 100 mg of  
571 ground root tissue were lysed in 1 mL of the new lysis buffer using a Tissue Lyser at max frequency  
572 for 2 min. The lysate was centrifuged at 4° C for 5 min at max speed. The supernatant (500 µL)  
573 was transferred to a new tube for the following steps of RNA isolation as per protocol. RNA  
574 samples were then purified, and DNase treated using the RNeasy Plant Mini Kit (Qiagen, Hilden,  
575 Germany). The RNA quality was confirmed by running an aliquot of each sample on an  
576 Experion™ Automated Electrophoresis System (Bio-Rad, Hercules, CA).

### 577 **PacBio IsoSeq sequencing**

578 Full-length cDNA Iso-Seq template libraries for PacBio IsoSeq analysis were constructed and  
579 sequenced at the DNA Technologies & Expression Analysis Core Facility of the UC Davis  
580 Genome Center. FL double-stranded cDNA was generated from total RNA (2 µg per tissue) using  
581 the Lexogen Telo™ prime Full-length cDNA Kit (Lexogen, Inc., Greenland, NH, USA). Tissue-  
582 specific cDNAs were first barcoded by PCR (16-19 cycles) using IDT barcoded primers  
583 (Integrated DNA Technologies, Inc., Coralville, Iowa), and then bead-size selected with AMPure  
584 PB beads (two different size fractions of 1X and 0.4X). The nine cDNAs were pooled in equimolar  
585 ratios and used to prepare a SMRTbell™ library using the PacBio Template Prep Kit (PacBio,  
586 Menlo Park, CA). The SMRTbell™ library was then sequenced across four Sequel v2 SMRT cells  
587 with polymerase 2.1 and chemistry 2.1 (P2.1C2.1).

588 PacBio raw reads were processed using the Isoseq3 v.3.0 workflow following PacBio  
589 recommendations (<https://github.com/PacificBiosciences/IsoSeq3>). Circular consensus sequences  
590 (CCSs) were generated using the program ‘ccs’  
591 (<https://github.com/PacificBiosciences/unanimity>). The CCSs were demultiplexed and cleaned of  
592 cDNA primers using the program ‘lima’ (<https://github.com/pacificbiosciences/barcoding>).  
593 Afterward, CCS clustering and polishing was performed using the program ‘isoseq3’, to generate  
594 HQ FL sequences for each of the nine tissues. FLnc and HQ clusters were aligned onto the new  
595 ‘Chandler’ assembly v2.0 with minimap2 v.2.12-r827, including the parameter ‘-ax splice’ (Li  
596 2018).

#### 597 **Repeat annotation**

598 A genome-specific repeat database was created using the ‘basic’ mode implemented in  
599 RepeatModeler v.1.0.11 (Smit and Hubley 2008). RepeatMasker v.4.0.7 was then run to mask  
600 repeats in the walnut reference genome v.2.0 and generate a GFF file (Smit et al. 2013).

#### 601 **Gene prediction and functional annotation**

602 *J. regia* RefSeq transcripts and additional *J. regia* transcripts and protein sequences downloaded  
603 from NCBI ([ftp.ncbi.nlm.nih.gov/genomes/all/GCF/001/411/555/GCF\\_001411555.1\\_wgs.5d/](ftp.ncbi.nlm.nih.gov/genomes/all/GCF/001/411/555/GCF_001411555.1_wgs.5d/)),  
604 along with the HQ FL IsoSeq transcripts, were used as input to the PASA pipeline v.2.3.3 (Haas  
605 et al. 2003), to assemble a genome-based transcript annotation. PASA utilizes the aligners BLAT  
606 v.35 (Kent 2002) and GMAP v.2018-07-04 (Wu and Watanabe 2005), along with TransDecoder  
607 v.5.5.0 (Haas et al. 2013), which predicts open reading frames (ORFs) as genome-based GFF  
608 coordinates. The final PASA/TransDecoder GFF3 file was post-processed to name the genes and  
609 transcripts by chromosome location consistently. Functional roles were assigned to predicted

610 peptides using Trinotate v.3.1.1 (Grabherr et al. 2011). In particular, similarity searches were  
611 performed against several public databases (i.e., Uniprot/Swiss-Prot, NCBI NR,  
612 *Vitis\_vinifera.IGGP\_12x*, *J. regia* RefSeq) using BLAST v.2.8.1, HMMER v.3.1b2, SignalP  
613 v.4.1c, and TMHMM v.2.0c.

614 The completeness and quality of both genome assembly and gene annotation of Chandler v.2.0  
615 were estimated with the BUSCO method v.3 (1,440 core genes in the embryophyte dataset) (Simão  
616 et al. 2015), and the sets of coreGFs of green plants (2,928 coreGFs) and rosids (6,092 coreGFs)  
617 from PLAZA v.2.5 (Veeckman et al. 2016). Also, RNA-Seq data generated for 20 tissues (see  
618 Martínez-García et al., 2016) were aligned to the reference genome (v1 and v2) with HISAT2  
619 (Kim et al. 2015). The alignments of the 20 RNA-seq data and the FL transcripts along with the  
620 new genome annotation v2.0 were then used as input to StringTie v.2.0 (Pertea et al. 2016) to  
621 estimate expression levels in both fragments per kilobase per million reads (FPKM) and transcripts  
622 per million (TPM) for each transcript in the v2 annotation.

623 The percent identity and coverage of each *J. regia* transcript compared to proteins in the NCBI  
624 plant RefSeq database was also determined by running the EnTAP pipeline v.0.9.0 (Hart et al.  
625 2018).

## 626 **Label-free shotgun proteomics**

627 Plant tissues of immature, intermediate, mature catkins and pure pollen from three individual trees  
628 of Chandler at the UCD walnut orchards were collected and frozen immediately in dry ice. Tissues  
629 were then further frozen in liquid nitrogen in the laboratory and ground with mortar and pestle.  
630 Five hundred milligrams of each sample were used for total protein extraction, following the  
631 procedure for recalcitrant plant tissues of (Valerie et al. 2006), with a modification in the final

632 buffer used to resuspend the protein pellet, consisting of 8M urea in 50mM triethylammonium  
633 bicarbonate (TEAB). One hundred micrograms of total protein from each sample were then used  
634 for proteomics.

635 Initially, 5 mM dithiothreitol (DTT) was added and incubated at 37°C for 30 min and 1,000 rpm  
636 shaking. Next, 15 mM iodoacetamide (IAA) was added, followed by incubation at room  
637 temperature for 30 min. The IAA was then neutralized with 30 mM DTT in incubation for 10 min.  
638 Lys-C/trypsin then was added (1:25 enzyme: total protein) followed by 4 h incubation at 37°C.  
639 After, TEAB (550  $\mu$ l of 50 mM) was added to dilute the urea and activate trypsin digestion  
640 overnight. The digested peptides were desalted with Aspire RP30 Desalting Tips (Thermo  
641 Scientific), vacuum dried, and suspended in 45  $\mu$ l of 50 mM TEAB. Peptides were quantified by  
642 Pierce quantitative fluorometric assay (Thermo Scientific) and 1  $\mu$ g analyzed on a QExactive mass  
643 spectrometer (Thermo Scientific) coupled with an Easy-LC source (Thermo Scientific) and a  
644 nanospray ionization source. The peptides were loaded onto a Trap (100 microns, C18 100 Å 5U)  
645 and desalted online before separation using a reversed-phase (75 microns, C18 200 Å 3U) column.  
646 The duration of the peptide separation gradient was 60 min using 0.1% formic acid and 100%  
647 acetonitrile (ACN) for solvents A and B, respectively. The data were acquired using a data-  
648 dependent MS/MS method, which had a full scan range of 300-1,600 Da and a resolution of  
649 70,000. The resolution of the MS/MS method was 17,500 and the insulation width 2 m/z with a  
650 normalized collision energy of 27. The nanospray source was operated using a spray voltage of  
651 2.2 KV and a transfer capillary temperature heated to 250°C. Samples were analyzed at the UC  
652 Davis Proteome Core.

653 The raw data were analyzed using X! Tandem and viewed using the Scaffold Software v.4.  
654 (Proteome Software, Inc.). Samples were searched against UniProt databases appended with the



655 cRAP database, which recognizes common laboratory contaminants. Reverse decoy databases  
656 were also applied to the database before the X! Tandem searches. The protein-coding sequences  
657 (CDS) annotated in Chandler v1.0 (NCBI accession PRJNA350852) and v2.0 were used as a  
658 reference for identification of proteins from the mass spectrometry data. The proteins identified  
659 were filtered in the Scaffold software based on the following criteria: 1.0% FDR (false discovery  
660 rate) at protein level (following the prophet algorithm: <http://proteinprophet.sourceforge.net/>), the  
661 minimum number of 2 peptides and 0.1% FDR at the peptide level. Structure of the walnut allergen  
662 (Jug r 9) was modelled using SWISS-MODEL (Arnold et al. 2006) based on the structure of a  
663 homologous allergen from lentil (PDBid:2MAL). Structures were superimposed using  
664 MUSTANG (2MAL:in red, walnut in blue) (Konagurthu et al. 2006).

#### 665 **Chandler genomic diversity**

666 Illumina whole-genome shotgun data of Chandler were aligned on the Chandler v2.0 with BWA  
667 (Li and Durbin 2009) with standard parameters. SNP calling was performed using SAMtools v1.9  
668 (Li et al. 2009) and BCFtools v.2.1 (Narasimhan et al. 2016). SNP density for windows of 1 Mb  
669 was estimated using the command ‘SNPdensity’ implemented in VCFtools v0.1.16 (Danecek et  
670 al. 2011). Self-collinearity analysis to detect duplicated regions in Chandler v2.0 was performed  
671 with MCScanX (Wang et al. 2012), using a simplified GFF file of the new gene annotation and a  
672 self-BLASTP as input. To improve the power of collinearity detection, tandem duplications were  
673 excluded after running the function ‘detect\_collinear\_tandem\_arrays’ implemented in MCScanX.  
674 Synonymous ( $K_S$ ) and nonsynonymous ( $K_A$ ) changes for syntenic protein-coding gene pairs were  
675 measured using the Perl script “add\_ka\_and\_ks\_to\_collinearity.pl” implemented in MCScanX.  
676 To explore the inbreeding level across the 16 chromosomal pseudomolecules of Chandler,  
677 haplotypes were built for 55 individuals of the UCD-WIP, including 25 founders and several

678 commercially relevant walnut cultivars (e.g., Chandler, Howard, Tulare, Vina, Franquette) along  
679 with their parents and progenitors. All individuals were genotyped using the latest Axiom™ *J.*  
680 *regia* 700K SNP array as described in (Marrano et al. 2018). To define SNP HBs, 26,544 unique  
681 and robust SNPs were selected and ordered according to the Chandler genome v2.0 physical map.  
682 Subsequently, for each SNP markers and individual, phasing and identification of closely linked  
683 groups of SNPs, without recombination in most of the pedigree, was performed using the software  
684 FlexQTL™ (Bink et al. 2014) and PediHaplotyper (Voorrips et al. 2016) following the approach  
685 described in (Vanderzande et al. 2019) and (Voorrips et al. 2016). In particular, HB were defined  
686 by recombination sites detected in ancestral generation of Chandler.

#### 687 **Genomic comparison between Eastern and Western walnuts**

688 The resequencing data of 23 founders of the UCD-WIP (**Supplemental Table S16**)(Stevens et al.  
689 2018) were mapped onto the Chandler v2.0 with BWA, and SNPs were called following the same  
690 procedure described above for Chandler. SNPs with no missing data and minor allele frequency  
691 (MAF) higher than 10% were retained for the following genetic analyses (7,269,224 SNPs out of  
692 the 14,988,422 identified). Hierarchical cluster analysis on a dissimilarity matrix of the 23 UCD-  
693 WIP founders was performed using R/SNPRelate v.1.18.0 (Zheng et al. 2012). Fixation index ( $F_{ST}$ )  
694 was measured between genotypes from EU/USA and Asia with VCFtools v0.1.16, setting  
695 windows of 100kb and 500kb. Genomic windows with the top 5% of  $F_{ST}$  values were selected as  
696 candidate regions for further analysis. The empirical cutoff with a low false discovery rate (5%)  
697 was verified by performing whole-genome permutation test (1000) with a custom Python script.  
698 Nucleotide diversity ( $\pi$ ) and Tajima's D (Tajima 1989) were also computed along the whole  
699 genome in 100-kb and 500-kb windows using VCFtools. Reduction of diversity coefficient (ROD)  
700 was estimated as  $1 - (\pi_{Occ} / \pi_{Asia})$ . The new walnut gene annotation v.2.0 was used to identify

701 predicted genes in the candidate regions under selection. The distribution of the identified genes  
702 into different biological processes was evaluated using the weight01 method provided by the  
703 R/topGO (Alexa 2015). The Kolmogorov–Smirnov-like test was performed to assess the  
704 significance of over-representation of GO categories compared with all genes in the walnut gene  
705 prediction. Plots were obtained using the R/circlize v.0.4.6 and R/ggplot2 v.3.5.3 packages.

## 706 **DATA ACCESS**

707 All raw and processed sequencing data generated in this study have been submitted to the NCBI  
708 BioProject database (<https://www.ncbi.nlm.nih.gov/bioproject/>) under accession number  
709 PRJNA291087. All SNP data have been submitted to Hardwood Genomics  
710 (<https://hardwoodgenomics.org/Genome-assembly/2539069>).

## 711 **ACKNOWLEDGMENTS**

712 We thank the Californian Walnut Board for funding this project. We are also grateful to Sriema  
713 Walawage for assistance with RNA extraction, and Brett Phinney for preparing the raw proteome  
714 data.

## 715 **AUTHOR CONTRIBUTION**

716 DBN and AM conceived and coordinated the research. REW and WT performed the HMW DNA  
717 extraction and Nanopore sequencing. AVZ, DP and SLS assembled the hybrid Illumina-ONT  
718 assembly. LB, MT, DP and SLS validated and anchored the HiRise assembly to the genetic maps.  
719 AM and BJA collected and extracted all RNA samples. MB analyzed the PacBio IsoSeq results  
720 and performed the repeat and gene annotation. AD conceived the design of the proteomic analyses;  
721 PAZ and SC generated and analyzed the proteomic data. LB called the SNPs in Chandler and the  
722 23 UCD WIP founders, while AM carried out the analyses on walnut genomic diversity. EAD, LB

723 and MT built and analyzed the SNP haplotypes. CAL provided all the plant material. AM wrote  
724 the manuscript, which has been revised by all coauthors.

## 725 **DISCLOSURE DECLARATION**

726 The authors declare no conflict of interest.

727

## 728 **REFERENCES**

729 Alexa A. 2015. Gene set enrichment analysis with topGO. 47–53.

730 Arab MM, Marrano A, Abdollahi-Arpanahi R, Leslie CA, Askari H, Neale DB, Vahdati K. 2019.  
731 Genome-wide patterns of population structure and association mapping of nut-related traits  
732 in Persian walnut populations from Iran using the Axiom *J. regia* 700K SNP array. *Sci Rep*  
733 **9**: 6376. <http://www.nature.com/articles/s41598-019-42940-1>.

734 Aradhya M, Woeste K, Velasco D. 2010. Genetic diversity, structure and differentiation in  
735 cultivated walnut (*Juglans regia* L.). *Acta Hortic* **861**: 127–132.

736 Arnold K, Bordoli L, Kopp J, Schwede T. 2006. The SWISS-MODEL workspace: A web-based  
737 environment for protein structure homology modelling. *Bioinformatics*.

738 Belser C, Istace B, Denis E, Dubarry M, Baurens FC, Falentin C, Genete M, Berrabah W,  
739 Chèvre AM, Delourme R, et al. 2018. Chromosome-scale assemblies of plant genomes  
740 using nanopore long reads and optical maps. *Nat Plants* **4**: 879–887.  
741 <http://dx.doi.org/10.1038/s41477-018-0289-4>.

742 Belton JM, McCord RP, Gibcus JH, Naumova N, Zhan Y, Dekker J. 2012. Hi-C: A  
743 comprehensive technique to capture the conformation of genomes. *Methods* **58**: 268–276.

- 744 <http://dx.doi.org/10.1016/j.ymeth.2012.05.001>.
- 745 Benson G. 1999. Tandem repeats finder: A program to analyze DNA sequences. *Nucleic Acids*  
746 *Res* **27**: 573–580.
- 747 Bernard A, Barreneche T, Lheureux F, Dirlewanger E. 2018a. Analysis of genetic diversity and  
748 structure in a worldwide walnut (*Juglans regia* L.) germplasm using SSR markers. *PLoS*  
749 *One* **13**: 1–19.
- 750 Bernard A, Lheureux F, Dirlewanger E. 2018b. Walnut: past and future of genetic improvement.  
751 *Tree Genet Genomes* **14**: 1–28.
- 752 Bink MCAM, Jansen J, Madduri M, Voorrips RE, Durel CE, Kouassi AB, Laurens F, Mathis F,  
753 Gessler C, Gobbin D, et al. 2014. Bayesian QTL analyses using pedigreed families of an  
754 outcrossing species, with application to fruit firmness in apple. *Theor Appl Genet* **127**:  
755 1073–1090.
- 756 Costa J, Carrapatoso I, Oliveira MBPP, Mafra I. 2014. Walnut allergens: Molecular  
757 characterization, detection and clinical relevance. *Clin Exp Allergy* **44**: 319–341.
- 758 Daccord N, Celton JM, Linsmith G, Becker C, Choisne N, Schijlen E, Van De Geest H, Bianco  
759 L, Micheletti D, Velasco R, et al. 2017. High-quality de novo assembly of the apple genome  
760 and methylome dynamics of early fruit development. *Nat Genet* **49**: 1099–1106.  
761 <http://dx.doi.org/10.1038/ng.3886>.
- 762 Danecek P, Auton A, Abecasis G, Albers CA, Banks E, DePristo MA, Handsaker RE, Lunter G,  
763 Marth GT, Sherry ST, et al. 2011. The variant call format and VCFtools. *Bioinformatics* **27**:  
764 2156–2158.

- 765 Dangl GS, Woeste K, Aradhya MK, Koehmstedt A, Simon C, Potter D, Leslie C a., McGranahan  
766 G. 2005. Characterization of 14 Microsatellite Markers for Genetic Analysis and Cultivar  
767 Identification of Walnut. *J Am Soc Hortic Sci* **130**: 348–354.  
768 [http://journal.ashspublications.org/content/130/3/348%5Cnhttp://journal.ashspublications.or](http://journal.ashspublications.org/content/130/3/348%5Cnhttp://journal.ashspublications.org/content/130/3/348.full.pdf)  
769 [g/content/130/3/348.full.pdf](http://journal.ashspublications.org/content/130/3/348.full.pdf).
- 770 Deschamps S, Zhang Y, Llacá V, Ye L, Sanyal A, King M, May G, Lin H. 2018. A  
771 chromosome-scale assembly of the sorghum genome using nanopore sequencing and optical  
772 mapping. *Nat Commun* **9**: 4844.
- 773 Ebrahimi A, Zarei A, Lawson S, Woeste KE, Smulders MJM. 2016. Genetic diversity and  
774 genetic structure of Persian walnut (*Juglans regia*) accessions from 14 European, African,  
775 and Asian countries using SSR markers. *Tree Genet Genomes* **12**: 114.  
776 <http://link.springer.com/10.1007/s11295-016-1075-y>.
- 777 Famula RA, Richards JH, Famula TR, Neale DB. 2019. Association Genetics of Carbon Isotope  
778 Discrimination in the Founding Individuals of a Breeding Population of *Juglans regia* L.  
779 *Tree Genet Genomes* **15**: 6. <https://doi.org/10.1007/s11295-018-1307-4>.
- 780 Gauthier MM, Jacobs DF. 2011. Walnut (*Juglans* spp.) ecophysiology in response to  
781 environmental stresses and potential acclimation to climate change. *Ann For Sci* **68**: 1277–  
782 1290.
- 783 Grabherr MG, Haas BJ, Yassour M, Levin JZ, Thompson DA, Amit I, Adiconis X, Fan L,  
784 Raychowdhury R, Zeng Q, et al. 2011. Full-length transcriptome assembly from RNA-Seq  
785 data without a reference genome. *Nat Biotechnol*.
- 786 Haas BJ, Delcher AL, Mount SM, Wortman JR, Smith Jr RK, Hannick LI, Maiti R, Ronning

- 787 CM, Rusch DB, Town CD, et al. 2003. Improving the Arabidopsis genome annotation using  
788 maximal transcript alignment assemblies. *Nucleic Acids Res* **31**: 5654–5666.
- 789 Haas BJ, Papanicolaou A, Yassour M, Grabherr M, Blood PD, Bowden J, Couger MB, Eccles D,  
790 Li B, Macmanes MD, et al. 2013. De novo transcript sequence reconstruction from RNA-  
791 Seq: reference generation and analysis with Trinity. *Nat Protoc* **8**: 1–43.
- 792 Hart AJ, Ginzburg S, Xu M (Sam), Fisher CR, Rahmatpour N, Mitton JB, Paul R, Wegrzyn JL.  
793 2018. EnTAP: bringing faster and smarter functional annotation to non-model eukaryotic  
794 transcriptomes. *bioRxiv* 307868.  
795 <https://www.biorxiv.org/content/biorxiv/early/2018/04/28/307868.full.pdf>  
796 <https://www.biorxiv.org/content/early/2018/04/24/307868>  
797 18/04/24/307868.
- 798 Jamet E, Santoni V. 2018. Editorial for Special Issue: 2017 Plant Proteomics. *proteomes* **6**: 28.
- 799 Jarvis DE, Ho YS, Lightfoot DJ, Schmöckel SM, Li B, Borm TJA, Ohyanagi H, Mineta K,  
800 Michell CT, Saber N, et al. 2017. The genome of *Chenopodium quinoa*. *Nature* **542**: 307–  
801 312.
- 802 Kefayati S, Ikhsan AS, Sutyemez M, Paizila A, Topcu H, Bukubu SB, Kafkas S. 2018. First  
803 simple sequence repeat-based genetic linkage map reveals a major QTL for leafing time in  
804 walnut (*Juglans regia* L.). *Tree Genet Genomes* **15**: 13.
- 805 Kent WJ. 2002. BLAT — The BLAST -Like Alignment Tool. *Genome Res* **12**: 656–664.
- 806 Kim D, Langmead B, Salzberg SL. 2015. HISAT: A fast spliced aligner with low memory  
807 requirements. *Nat Methods*.

- 808 Konagurthu AS, Whisstock JC, Stuckey PJ, Lesk AM. 2006. MUSTANG: A multiple structural  
809 alignment algorithm. *Proteins Struct Funct Genet*.
- 810 Leggett RM, Clark MD. 2017. A world of opportunities with nanopore sequencing. *J Ex* **68**:  
811 5419–5429.
- 812 Li H. 2018. Minimap2 : pairwise alignment for nucleotide sequences. *Bioinformatics* **34**: 3094–  
813 3100.
- 814 Li H, Durbin R. 2009. Fast and accurate short read alignment with Burrows-Wheeler transform.  
815 *Bioinformatics* **25**: 1754–1760.
- 816 Li H, Handsaker B, Wysoker A, Fennell T, Ruan J, Homer N, Marth G, Abecasis G, Durbin R.  
817 2009. The Sequence Alignment/Map format and SAMtools. *Bioinformatics* **25**: 2078–2079.
- 818 Lieberman-Aiden E, Van Berkum NL, Williams L, Imakaev M, Ragozy T, Telling A, Amit I,  
819 Lajoie BR, Sabo PJ, Dorschner MO, et al. 2009. Comprehensive mapping of long-range  
820 interactions reveals folding principles of the human genome. *Science* (80- ).
- 821 Linsmith G, Rombauts S, Montanari S, Deng CH, Guérif P, Liu C, Lohaus R, Zurn JD, Cestaro  
822 A, Bassil N V, et al. 2019. Pseudo-chromosome length genome assembly of a double  
823 haploid ‘ Bartlett ’ pear (*Pyrus communis* L .). *bioRxiv*.
- 824 Lu H, Giordano F, Ning Z. 2016. Oxford Nanopore MinION Sequencing and Genome  
825 Assembly. *Genomics, Proteomics Bioinforma* **14**: 265–279.  
826 <http://dx.doi.org/10.1016/j.gpb.2016.05.004>.
- 827 Luo M-C, You FM, Li P, Wang J-R, Zhu T, Dandekar AM, Leslie CA, Aradhya M, McGuire  
828 PE, Dvorak J. 2015. Synteny analysis in Rosids with a walnut physical map reveals slow



- 829 genome evolution in long-lived woody perennials. *BMC Genomics* **16**: 1–17.
- 830 <http://www.biomedcentral.com/1471-2164/16/707>.
- 831 Maccaferri M, Harris NS, Twardziok SO, Pasam RK, Gundlach H, Spannagl M, Ormanbekova  
832 D, Lux T, Prade VM, Milner SG, et al. 2019. Durum wheat genome highlights past  
833 domestication signatures and future improvement targets. *Nat Genet* **51**: 885–895.
- 834 Marçais G, Delcher AL, Phillippy AM, Coston R, Salzberg SL, Zimin A. 2018. MUMmer4: A  
835 fast and versatile genome alignment system. *PLoS Comput Biol* **14**: 1–14.
- 836 Marrano A, Martínez-García PJ, Bianco L, Sideli GM, Di Pierro EA, Leslie CA, Stevens KA,  
837 Crepeau MW, Troggio M, Langley CH, et al. 2018. A new genomic tool for walnut (  
838 *Juglans regia* L.): development and validation of the high-density Axiom™ *J. regia* 700K  
839 SNP genotyping array. *Plant Biotechnol J* 1–10. <http://doi.wiley.com/10.1111/pbi.13034>.
- 840 Marrano A, Sideli GM, Leslie CA, Cheng H, Neale DB. 2019. Deciphering of the genetic control  
841 of phenology, yield and pellicle color in Persian walnut (*Juglans regia* L.). *Front Plant Sci*  
842 **10**: 1–14.
- 843 Marroni F, Pinosio S, Morgante M. 2014. Structural variation and genome complexity : is  
844 dispensable really dispensable ? *Curr Opin Plant Biol* **18**: 31–36.  
845 <http://dx.doi.org/10.1016/j.pbi.2014.01.003>.
- 846 Martínez-García PJ, Crepeau MW, Puiu D, Gonzalez-Ibeas D, Whalen J, Stevens KA, Paul R,  
847 Butterfield TS, Britton MT, Reagan RL, et al. 2016. The walnut (*Juglans regia*) genome  
848 sequence reveals diversity in genes coding for the biosynthesis of non-structural  
849 polyphenols. *Plant J* **87**: 507–532.

- 850 Martínez ML, Labuckas DO, Lamarque AL, Maestri DM. 2010. Walnut (*Juglans regia* L.):  
851 Genetic resources, chemistry, by-products. *J Sci Food Agric* **90**: 1959–1967.
- 852 Mayjonade B, Gouzy J, Donnadieu C, Pouilly N, Marande W, Callot C, Langlade N, Muños S.  
853 2017. Extraction of high-molecular-weight genomic DNA for long-read sequencing of  
854 single molecules. *Biotechniques* **62**: xv.
- 855 McGranahan G, Leslie C. 2012. Walnut. In *Fruit Breeding* (eds. M.L. Badenes and D.H. Byrne),  
856 pp. 827–846, Springer Science+Business Media, LLC.
- 857 McGranahan GH, Leslie CA. 1991. Walnuts. In *Genetic Resources of Temperate Fruit and Nut*  
858 *Crops* (eds. J.N. Moore and J.R.J. Ballington), pp. 907–918, International Society for  
859 Horticultural Science.
- 860 Minoche AE, Dohm JC, Schneider J, Holtgräwe D, Viehöver P, Montfort M, Rosleff Sørensen  
861 T, Weisshaar B, Himmelbauer H. 2015. Exploiting single-molecule transcript sequencing  
862 for eukaryotic gene prediction. *Genome Biol* **16**: 1–13. [http://dx.doi.org/10.1186/s13059-](http://dx.doi.org/10.1186/s13059-015-0729-7)  
863 [015-0729-7](http://dx.doi.org/10.1186/s13059-015-0729-7).
- 864 Narasimhan V, Danecek P, Scally A, Xue Y, Tyler-smith C, Durbin R. 2016. BCFtools/RoH : a  
865 hidden Markov model approach for detecting autozygosity from next-generation sequencing  
866 data. *Bioinformatics* **32**: 1749–1751.
- 867 Pertea M, Kim D, Pertea GM, Leek JT, Salzberg SL. 2016. Transcript-level expression analysis  
868 of RNA-seq experiments with HISAT, StringTie and Ballgown. *Nat Protoc*.
- 869 Pollegioni P, Woeste K, Chiocchini F, Del Lungo S, Ciolfi M, Olimpieri I, Tortolano V, Clark J,  
870 Hemery GE, Mapelli S, et al. 2017. Rethinking the history of common walnut (*Juglans*

- 871 *regia* L.) in Europe: Its origins and human interactions. *PLoS One* **12**: 1–24.
- 872 Putnam NH, O’Connell, Brendan L. Stites JC, Rice BJ, Blanchette M, Calef R, Troll CJ, Fields  
873 A, Hartley PD, Sugnet CW, Haussler D, et al. 2016. Chromosome-scale shotgun assembly  
874 using an in vitro method for long-range linkage. *Genome Res* **26**: 342–350.
- 875 Rang FJ, Kloosterman WP, de Ridder J. 2018. From squiggle to basepair: Computational  
876 approaches for improving nanopore sequencing read accuracy. *Genome Biol* **19**: 1–11.
- 877 Raymond O, Gouzy J, Just J, Badouin H, Verdenaud M, Lemainque A, Vergne P, Moja S,  
878 Choisine N, Pont C, et al. 2018. The Rosa genome provides new insights into the  
879 domestication of modern roses. *Nat Genet* **50**: 772–777.
- 880 Rezvoy C, Charif D, Guéguen L, Marais GAB. 2007. MareyMap: An R-based tool with  
881 graphical interface for estimating recombination rates. *Bioinformatics* **23**: 2188–2189.
- 882 Rhoads A, Au KF. 2015. PacBio Sequencing and Its Applications. *Genomics, Proteomics*  
883 *Bioinforma* **13**: 278–289. <http://dx.doi.org/10.1016/j.gpb.2015.08.002>.
- 884 Ruiz-Garcia L, Lopez-Ortega G, Fuentes Denia A, Frutos Tomas D. 2011. Identification of a  
885 walnut (*Juglans regia* L.) germplasm collection and evaluation of their genetic variability  
886 by microsatellite markers. *Spanish J Agric Res* **9**: 179–192.
- 887 Sánchez-Pérez R, Pavan S, Mazzeo R, Moldovan C, Aiese Cigliano R, Del Cueto J, Ricciardi F,  
888 Lotti C, Ricciardi L, Dicenta F, et al. 2019. Mutation of a bHLH transcription factor  
889 allowed almond domestication. *Science (80- )* **364**: 1095–1098.  
890 <http://www.sciencemag.org/lookup/doi/10.1126/science.aav8197>.
- 891 Schmidt MH-W, Vogel A, Denton AK, Istace B, Wormit A, van de Geest H, Bolger ME,

- 892 Alseekh S, Maß J, Pfaff C, et al. 2017. De Novo Assembly of a New *Solanum pennellii*  
893 Accession Using Nanopore Sequencing . *Plant Cell* **29**: 2336–2348.
- 894 Simão FA, Waterhouse RM, Ioannidis P, Kriventseva E V., Zdobnov EM. 2015. BUSCO:  
895 Assessing genome assembly and annotation completeness with single-copy orthologs.  
896 *Bioinformatics* **31**: 3210–3212.
- 897 Smit A, Hubley R. 2008. RepeatModeler Open-1.0. <http://www.repeatmasker.org>.
- 898 Smit A, Hubley R, Green P. 2013. RepeatMasker Open-4.0. <http://www.repeatmasker.org>.
- 899 Springer NM, Ying K, Fu Y, Ji T, Yeh C, Jia Y, Wu W, Kitzman J, Rosenbaum H, Iniguez AL,  
900 et al. 2009. Maize Inbreds Exhibit High Levels of Copy Number Variation ( CNV ) and  
901 Presence/Absence Variation ( PAV ) in Genome Content. *PLoS Genet* **5**.
- 902 Stevens KA, Woeste K, Chakraborty S, Crepeau MW, Leslie CA, Martínez-García PJ, Puiu D,  
903 Romero-Severson J, Coggeshall M, Dandekar AM, et al. 2018. Genomic Variation Among  
904 and Within Six *Juglans* Species. *G3 Genes/Genomes/Genetics* **8**: 1–37.  
905 <http://www.ncbi.nlm.nih.gov/pubmed/29792315>[http://g3journal.org/lookup/doi/10.153](http://g3journal.org/lookup/doi/10.1534/g3.118.200030)  
906 [4/g3.118.200030](http://g3.118.200030).
- 907 Tajima F. 1989. Statistical method for testing the neutral mutation hypothesis by DNA  
908 polymorphism. *Genetics* **123**: 585–595.
- 909 Tang W, Sun X, Yue J, Tang X, Jiao C, Yang Y, Niu X, Miao M, Zhang D, Huang S, et al. 2019.  
910 Chromosome-scale genome assembly of kiwifruit *Actinidia eriantha* with single-molecule  
911 sequencing and chromatin interaction mapping. *Gigascience* **8**: 1–10.
- 912 Valerie M, Catherine D, Michel Z, Hervé T, Faurobert M, Pelpoir E, Chaïb J. 2006. Phenol

- 913           Extraction of Proteins for Proteomic Studies of Recalcitrant Plant Tissues. In *Plant*  
914           *Proteomics*.
- 915   Vanderzande S, Howard NP, Cai L, Da Silva Linge C, Antanaviciute L, Bink MCAM,  
916           Kruisselbrink JW, Bassil N, Gasic K, Iezzoni A, et al. 2019. High-quality, genome-wide  
917           SNP genotypic data for pedigreed germplasm of the diploid outbreeding species apple,  
918           peach, and sweet cherry through a common workflow. *PLoS One*.
- 919   Veeckman E, Ruttink T, Vandepoele K. 2016. Are We There Yet? Reliably Estimating the  
920           Completeness of Plant Genome Sequences. *Plant Cell* **28**: 1759–1768.
- 921   Voorrips RE, Bink MCAM, Kruisselbrink JW, Koehorst-van Putten HJJ, van de Weg WE. 2016.  
922           PediHaplotyper: software for consistent assignment of marker haplotypes in pedigrees. *Mol*  
923           *Breed* **36**.
- 924   Wang Y, Tang H, Debarry JD, Tan X, Li J, Wang X, Lee TH, Jin H, Marler B, Guo H, et al.  
925           2012. MCScanX: A toolkit for detection and evolutionary analysis of gene synteny and  
926           collinearity. *Nucleic Acids Res* **40**: 1–14.
- 927   Workman R, Fedak R, Kilburn D, Hao S, Liu K, Timp W. 2018. High Molecular Weight DNA  
928           Extraction from Recalcitrant Plant Species for Third Generation Sequencing. *Protoc Exch*  
929           1–12.
- 930   Wu TD, Watanabe CK. 2005. GMAP : a genomic mapping and alignment program for mRNA  
931           and EST sequences. *Bioinformatics* **21**: 1859–1875.
- 932   Yasodha R, Vasudeva R, Balakrishnan S, Sakthi AR, Abel N, Binai N, Rajashekar B, Bachpai  
933           VKW, Pillai C, Dev SA. 2018. Draft genome of a high value tropical timber tree, Teak

- 934 (*Tectona grandis* L. f): insights into SSR diversity, phylogeny and conservation. *DNA Res*  
935 **25**: 409–419.
- 936 Zeven A, Zhukovskii PM. 1975. *Dictionary of cultivated plants and their centres of diversity,*  
937 *excluding ornamentals, forest trees, and lower plants.* Centre for Agricultural Publishing  
938 and Documentation. Wageningen.
- 939 Zhang B, Xu L, Li N, Yan P, Jiang X, Woeste KE, Lin K, Renner SS, Zhang D, Bai W. 2019.  
940 Phylogenomics Reveals an Ancient Hybrid Origin of the Persian Walnut. *Mol Biol Evol* 1–  
941 11.
- 942 Zhang M, Zhang Y, Scheuring CF, Wu CC, Dong JJ, Zhang H Bin. 2012. Preparation of  
943 megabase-sized DNA from a variety of organisms using the nuclei method for advanced  
944 genomics research. *Nat Protoc* **7**: 467–478. <http://dx.doi.org/10.1038/nprot.2011.455>.
- 945 Zheng X, Levine D, Shen J, Gogarten SM, Laurie C, Weir BS. 2012. A high-performance  
946 computing toolset for relatedness and principal component analysis of SNP data.  
947 *Bioinformatics* **28**: 3326–3328.
- 948 Zhu T, Wang L, You FM, Rodriguez JC, Deal KR, Chen L, Li J, Chakraborty S, Balan B, Jiang  
949 C, et al. 2019. Sequencing a *Juglans regia* × *J. microcarpa* hybrid yields high-quality  
950 genome assemblies of parental species. *Hortic Res* 1–16. [http://dx.doi.org/10.1038/s41438-](http://dx.doi.org/10.1038/s41438-019-0139-1)  
951 [019-0139-1](http://dx.doi.org/10.1038/s41438-019-0139-1).
- 952 Zimin A V., Luo M, Marçais G, Salzberg SL, Yorke JA, Puiu D, Koren S, Zhu T, Dvořák J, Luo  
953 M, et al. 2017. Hybrid assembly of the large and highly repetitive genome of *Aegilops*  
954 *tauschii*, a progenitor of bread wheat, with the MaSuRCA mega-reads algorithm. *Genome*  
955 *Res* **27**: 787–792.

956 <http://www.ncbi.nlm.nih.gov/pubmed/28130360><http://www.pubmedcentral.nih.gov/art>  
957 <iclerender.fcgi?artid=PMC5411773>.  
958 Zimin A V., Marçais G, Puiu D, Roberts M, Salzberg SL, Yorke JA. 2013. The MaSuRCA  
959 genome assembler. *Bioinformatics* **29**: 2669–2677.  
960
